# Supplementary material for: H2O degassing triggered by alkali depletion in bimodal magma injection processes – a new experimental approach
Source: Copernicus journal article supplement (doi:10.5194/ejm-35-613-2023), 2023-08-02
Supplement: Supplementary file 1 [file ejm-35-613-2023-supplement.zip]

Archive with 5 entries (5 files):
- Fig. S2.pdf
- Table S1.xlsx
- Fig. S1.pdf
- Sample_Images_Supplement.zip
- ejm-35-613-2023-supplement-title-page.pdf
