# Supplementary material for: H2O degassing triggered by alkali depletion in bimodal magma injection processes – a new experimental approach
Source: Copernicus journal article supplement (doi:10.5194/ejm-35-613-2023), 2023-08-02
Supplement: Supplementary file 1 [file ejm-35-613-2023-supplement.zip › ejm-35-613-2023-supplement-title-page.pdf]

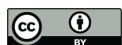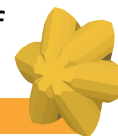

*Supplement of*

**H<sub>2</sub>O degassing triggered by alkali depletion in bimodal magma injection processes – a new experimental approach**

**Patricia Louisa Marks et al.**

*Correspondence to:* Patricia Louisa Marks ([patricia.marks@uni-tuebingen.de](mailto:patricia.marks@uni-tuebingen.de))

- [ejm-35-613-2023-supplement-title-page.pdf](#)
- [Fig. S1.pdf](#)
- [Fig. S2.pdf](#)
- [Sample\\_Images\\_Supplement.zip](#)
- [Table S1.xlsx](#)

The copyright of individual parts of the supplement might differ from the article licence.
