# Supplementary material for: H2O degassing triggered by alkali depletion in bimodal magma injection processes – a new experimental approach
Source: Copernicus journal article supplement (doi:10.5194/ejm-35-613-2023), 2023-08-02
Supplement: Supplementary file 1 [file ejm-35-613-2023-supplement.zip › Fig. S1.pdf]

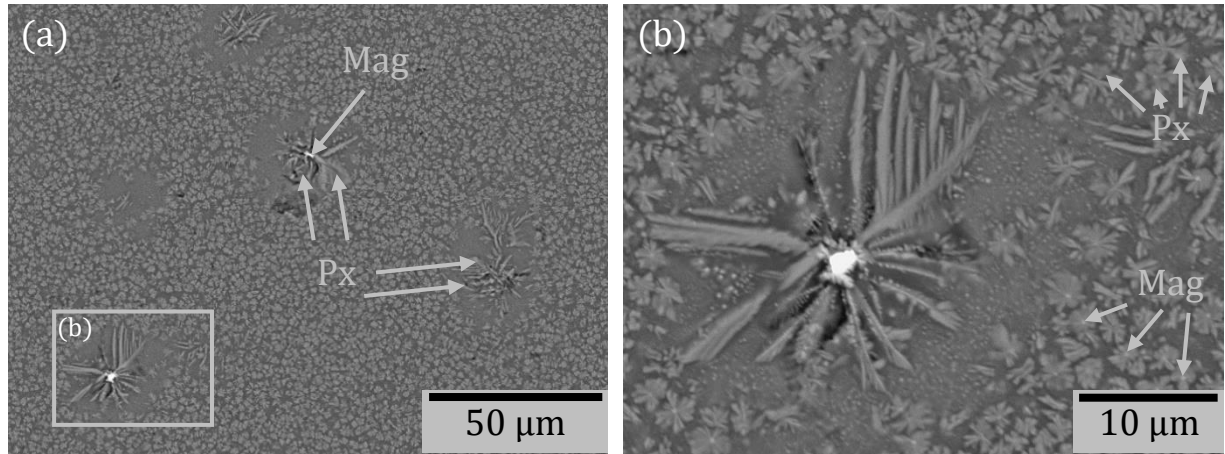

Fig. S1: BSE images of hydrated sample B\_2\_h at 200 MPa 1523 K and quenched normally with  $16 \text{ K}\cdot\text{s}^{-1}$ , showing a partially crystallized basaltic glass (a). Idiomorphic magnetite crystals (Mag) are surrounded by dendritic quench-crystals of pyroxenes (Px), embedded in the residual quenched melt (b).
