# Supplementary material for: H2O degassing triggered by alkali depletion in bimodal magma injection processes – a new experimental approach
Source: Copernicus journal article supplement (doi:10.5194/ejm-35-613-2023), 2023-08-02
Supplement: Supplementary file 1 [file ejm-35-613-2023-supplement.zip › Fig. S2.pdf]

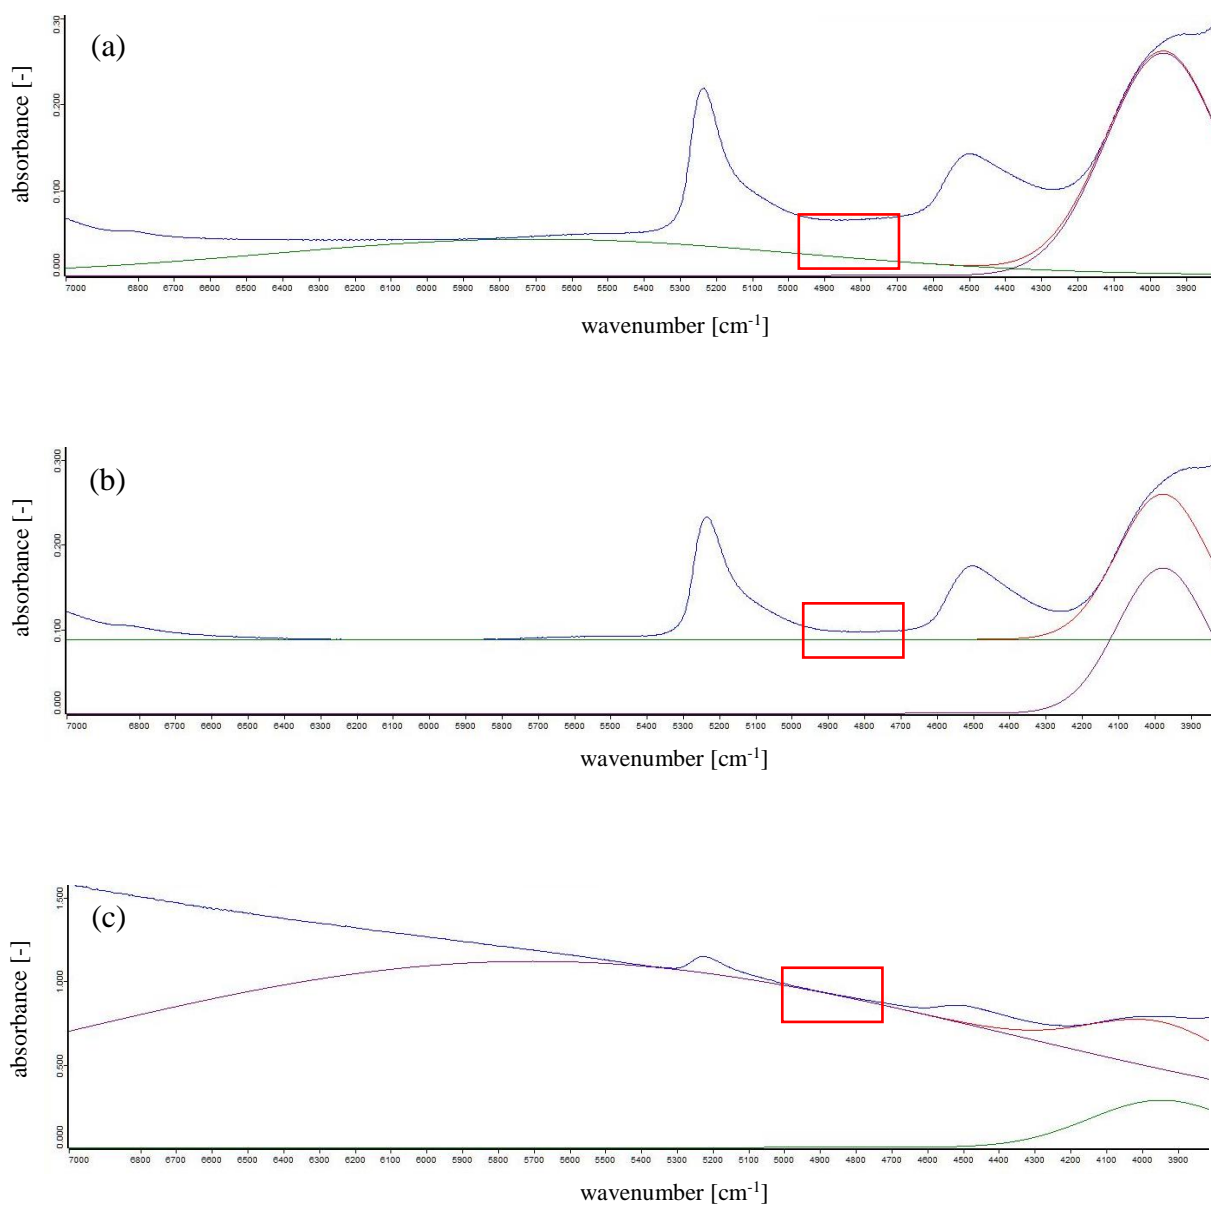

Fig. S2: a) Spectrum of sample MI\_5, first data point in rhyolitic composition. The applied Gaussian curve (green) cannot tangent the minimum between 4000  $\text{cm}^{-1}$  and 5200  $\text{cm}^{-1}$  (red box).  
b) Spectrum of sample MI\_5, second data point in dacitic composition. The applied Gaussian curve (green) cannot tangent the minimum between 4000  $\text{cm}^{-1}$  and 5200  $\text{cm}^{-1}$  (red box).  
c) Spectrum of sample MI\_5, last data point in dacitic composition with absorption <1. The applied Gaussian curve (violet) can tangent the minimum between 4000  $\text{cm}^{-1}$  and 5200  $\text{cm}^{-1}$  (red box) due to the increased slope of the spectrum.
