# Supplementary material for: H2O degassing triggered by alkali depletion in bimodal magma injection processes – a new experimental approach
Source: Copernicus journal article supplement (doi:10.5194/ejm-35-613-2023), 2023-08-02
Supplement: Supplementary file 1 [file ejm-35-613-2023-supplement.zip › Table S1.xlsx]

## Sheet: Comparison of H2O contents
Comparison of H2O contents
Comparison of the KFT H2O contents of AOQ2 (corresponding to this rhyolite composition) standard samples of Allabar et al. (2022) with the recalculated H2O contents. Absorption coefficients to determine H2O contents were calculated based on Allabar et al. (2022) and on Ohlhorst et al. (2001). All data are in good agreement for lower H2O contents, while cH2Ot calculated according to Ohlhorst diffe…
sample	KFT cH2Ot [wt%]	± [wt%]	Allabar et al. cH2Ot [wt%]	± [wt%]	Ohlhorst et al. cH2Ot [wt%]	± [wt%]
Std_2_0.5	0.48	0.08	0.46	0.04	0.47	0.05
Std_2_1	0.91	0.06	0.9	0.05	0.91	0.05
Std_2_1.66	1.55	0.05	1.58	0.18	1.59	0.19
Std_2_2	1.94	0.06	1.89	0.19	1.89	0.2
Std_2_4	3.98	0.07	3.86	0.19	3.77	0.2
Std_2_7	6.86	0.09	6.88	0.23	6.02	0.23

## Sheet: EMPA Profiles
EMP data
MI_T_3					MI_5, MI_6, MI_7						Element	Standard	Analysis crystal	Peak	Background
JEOL JXA 8900 R electron microprobe					JEOL JXA 8230 electron microprobe						Na	Albite	TAPL	10	5
acceleration voltage: 15 kV					acceleration voltage: 15 kV						Mg	Diopside	TAPL	16	8
beam current: 3 nA					beam current: 10 nA						Al	Albite	TAPL	16	8
defocused beam of 20 µm					defocused beam of 20 µm						Si	Albite	PETL	16	8
counting time: 10 s (Na), 16 s (K, Si, Ca, Al, Mg, Fe), 30 s (Mn, Ti)					counting time: 10 s (Na), 16 s (K, Si, Ca, Al, Mg, Fe), 30 s (Mn, Ti)						K	Sanidine	PETL	16	8
											Mn	Bastanite	LIFL	30	15
											Ca	Diopside	PETJ	16	8
											Ti	SrTiO3	PETJ	30	15
											Fe	Hematite	LIFL	16	8
MI_5	Profile from basalt (0.00) ro rhyolite (7.76)
distance [mm]	Na2O(Mass%)	MgO(Mass%)	Al2O3(Mass%)	SiO2(Mass%)	K2O(Mass%)	MnO(Mass%)	CaO(Mass%)	TiO2(Mass%)	FeO(Mass%)	Total(Mass%)								H2O(Mass%) by difference	position in diagramm
0	3.45	3.74	13.3	53.2	1.48	0.1896	7.63	1.86	9.7	94.5682								5.4318	2.1136			Rhyolite	Hybrid	Basalt
0.2193	3.41	3.77	13.33	53.32	1.53	0.1786	7.74	1.79	9.28	94.351								5.649	1.8943		Mean	4.40495	5.55879	5.88411
0.3597	3.48	3.76	13.16	52.78	1.51	0.1566	7.58	1.92	9.86	94.2537								5.7463	1.7539		Min	2.5975	4.7982	5.4318
0.5183	3.52	3.76	13.32	53.31	1.6	0.2206	7.74	1.85	9.01	94.3435								5.6565	1.5953		Max	5.0931	6.2547	6.9208
0.7038	3.44	3.75	13.21	52.75	1.69	0.2308	7.62	1.8	9.13	93.6302								6.3698	1.4098
0.9026	3.62	3.69	13.06	52.76	1.79	0.2219	7.44	1.86	9.74	94.1924								5.8076	1.211
1.075	3.76	3.58	13.34	53.72	1.8	0.1789	7.63	1.83	8.67	94.5089								5.4911	1.0386
1.0723	1.98	3.54	13.58	54.36	1.93	0.2088	7.22	1.86	8.4	93.0792								6.9208	1.0413
1.1462	3.76	3.45	13.24	53.89	1.99	0.1953	7.2	1.8	8.68	94.2155								5.7845	0.9674
1.2111	3.89	3.24	13.51	54.22	2.2	0.1852	6.97	1.89	8.51	94.6192								5.3808	0.9025
1.2461	3.9	3.17	13.1	54.97	2.48	0.1628	6.08	1.73	8.33	93.9463								6.0537	0.8675
1.2708	4.1	2.91	13.02	56.69	2.78	0.1386	5.5	1.5017	8.04	94.6984								5.3016	0.8428
1.301	4.21	2.43	12.97	59.06	3.02	0.1213	4.72	1.1285	6.44	94.1157								5.8843	0.8126
1.3517	3.6	1.5441	12.14	65.51	3.62	0.0774	2.81	0.3938	4.05	93.7453								6.2547	0.7619
1.3831	4.27	0.9368	12.02	69.21	3.88	0.0478	1.91	0.0719	2.63	94.9875								5.0125	0.7305
1.4422	4.39	0.1297	12.27	72.75	4.32	0.0102	0.9775	0	0.3431	95.2018								4.7982	0.6714
1.5217	4.53	0.0186	12.6	72.72	4.5	0.0201	0.4904	0	0.0264	94.9069								5.0931	0.5919
1.6272	4.9	0	12.76	72.86	4.7	0	0.2191	0.0053	0.0132	95.4715								4.5285	0.4864
1.7008	5.02	0.015	12.74	72.97	4.8	0	0.0762	0.0172	0	95.6692								4.3308	0.4128
1.788	5.23	0.0099	12.45	72.96	4.78	0.0038	0.0036	0	0.0132	95.4524								4.5476	0.3256
1.9721	5.52	0.0094	12.51	72.45	4.8	0	0	0	0.0165	95.3106								4.6894	0.1415
2.0354	5.57	0	12.49	72.08	4.8	0	0.01	0	0.0231	94.9731								5.0269	0.0782
2.1136	5.54	0.033	12.45	72.2	4.79	0.0187	0.0043	0	0.0264	95.0682								4.9318	0
4.3068	6.05	0.0092	12.31	72.02	5.08	0.005	0	0	0.0361	95.525								4.475
4.6156	6.02	0.0197	12.32	72.16	5.22	0.014	0.0187	0	0.0229	95.8031								4.1969
7.413	5.77	0.0164	12.68	73.67	5.25	0	0.0161	0	0	97.4025								2.5975
7.7631	6.01	0	12.55	72.31	5.03	0.021	0.0123	0.0069	0.0196	95.963								4.037
MI_T_3	Profile from basalt (0.00) ro rhyolite (3.61)
distance [mm]	Na2O(Mass%)	MgO(Mass%)	Al2O3(Mass%)	SiO2(Mass%)	K2O(Mass%)	MnO(Mass%)	CaO(Mass%)	TiO2(Mass%)	FeO(Mass%)	Total(Mass%)								H2O(Mass%) by difference	distance [mm]
0	3.74	3.6	13.27	54.21	1.55	0.236	7.39	1.88	9.37	95.327								4.673	3.61			Rhyolite	Hybrid	Basalt
0.52	3.62	3.78	13.52	53.53	1.58	0.244	7.44	1.8	10.15	95.742								4.258	3.09		Mean	2.39733	2.9874	4.22575
1.04	3.73	3.7	13.48	55.12	1.72	0.331	7.4	1.85	7.71	95.091								4.909	2.57		Min	1.924	2.208	3.311
1.2	4.12	3.51	13.41	55.81	1.99	0.183	7.06	1.73	8.01	95.846								4.154	2.41		Max	2.99	3.714	4.909
1.35	4.22	3.52	13.34	55.37	1.95	0.258	7.2	1.8	8.07	95.764								4.236	2.26
1.51	4.18	3.74	13.39	53.5	2.15	0.223	6.92	1.79	10.62	96.617								3.383	2.1
1.63	4.34	3.62	13.83	54.9	2.07	0.318	6.93	1.85	8.77	96.689								3.311	1.98
1.74	4.5	3.4	13.48	54.12	2.54	0.226	6.67	1.77	8.36	95.118								4.882	1.87
1.81	4.68	3.33	13.74	56.38	2.48	0.278	6.46	1.71	8.29	97.348								2.652	1.8
1.82	4.77	3.15	13.74	56.43	2.41	0.266	6.57	1.69	8.22	97.257								2.743	1.79
1.85	4.38	3.17	13.65	56.48	2.58	0.166	6.15	1.69	8.01	96.286								3.714	1.76
1.89	5.09	2.9	13.54	57.6	2.9	0.16	5.55	1.531	7.08	96.407								3.593	1.72
1.96	5.11	2.27	13.03	61.25	3.3	0.116	4.67	1.092	5.93	96.8								3.2	1.65
2.01	5.39	1.74	12.62	64.88	3.73	0.123	3.3	0.648	4.6	97.166								2.834	1.6
2.06	4.7	0.583	12.24	71.87	4.56	0.111	1.48	0.016	1.53	97.09								2.91	1.55
2.11	4.8	0.273	12.45	73.7	4.4	0.059	0.911	0.01	0.449	97.09								2.91	1.5
2.15	4.57	0.077	12.45	74.19	4.54	0.075	0.678	0	0.184	96.89								3.11	1.46
2.21	5.18	0.043	12.66	74.68	4.57	0.043	0.575	0	0.04	97.792								2.208	1.4
2.25	5.16	0.013	12.66	74.93	4.81	0.029	0.474	0	0	98.076								1.924	1.36
2.38	5.16	0	12.21	74.73	5.04	0.06	0.185	0.019	0.083	97.549								2.451	1.23
2.52	5.46	0.01	12.29	75.14	4.91	0.108	0.08	0	0.05	98.048								1.952	1.09
2.75	5.85	0.01	12.48	73.42	5.06	0.028	0.036	0.011	0.05	97.01								2.99	0.86
3.21	5.99	0	12.38	73.87	5.08	0.047	0	0.01	0.013	97.465								2.535	0.4
3.61	6.24	0	12.34	73.66	4.99	0.095	0	0	0.09	97.468								2.532	0
MI_7	Profile from basalt (0.00) ro rhyolite (5.76)
distance [mm]	Na2O(Mass%)	MgO(Mass%)	Al2O3(Mass%)	SiO2(Mass%)	K2O(Mass%)	MnO(Mass%)	CaO(Mass%)	TiO2(Mass%)	FeO(Mass%)	Total(Mass%)								H2O(Mass%) by difference	distance [mm]
0	3.62	3.77	13.37	54.65	1.58	0.1763	7.62	1.83	8.45	95.0791								4.9209	5.7569			Rhyolite	Hybrid	Basalt
0.1305	3.5	3.65	13.22	54.53	1.65	0.1923	7.75	1.8	8.96	95.2588								4.7412	5.6264		Mean	3.71467	4.37	4.35228
0.2559	3.65	3.64	13.17	54.84	1.61	0.1536	7.46	1.86	8.59	94.975								5.025	5.501		Min	2.769	3.3757	3.7802
0.418	3.71	3.61	13.28	55.3	1.54	0.1727	7.64	1.83	8.59	95.6727								4.3273	5.3389		Max	4.814	5.2033	5.025
0.6734	3.79	3.8	13.38	55.07	1.54	0.1673	7.59	1.84	7.98	95.1861								4.8139	5.0835
0.8377	3.73	3.67	13.27	54.87	1.52	0.1415	7.62	1.87	8.41	95.1306								4.8694	4.9192
0.9841	3.88	3.78	13.35	54.55	1.55	0.1631	7.64	1.78	9.25	95.9665								4.0335	4.7728
1.1501	3.81	3.66	13.32	55.12	1.54	0.166	7.62	1.75	8.45	95.449								4.551	4.6068
1.3466	3.85	3.75	13.34	55.18	1.57	0.1726	7.5	1.8	8.8	95.9674								4.0326	4.4103
1.5434	3.94	3.67	13.41	54.99	1.58	0.1694	7.59	1.85	8.74	95.9524								4.0476	4.2135
1.6822	3.9	3.72	13.07	54.73	1.62	0.208	7.5	1.85	8.75	95.3526								4.6474	4.0747
1.8446	3.95	3.64	13.13	55.06	1.6	0.2037	7.64	1.85	8.82	95.9007								4.0993	3.9123
1.9606	3.99	3.66	13.42	55.14	1.66	0.1903	7.53	1.87	8.75	96.2198								3.7802	3.7963
2.153	3.99	3.78	13.25	54.71	1.71	0.1693	7.49	1.81	8.78	95.7012								4.2988	3.6039
2.2636	4.04	3.79	13.25	55.14	1.85	0.1873	7.41	1.89	8.55	96.1269								3.8731	3.4933
2.464	4.04	3.72	13.29	54.89	1.85	0.1968	7.4	1.81	8.68	95.902								4.098	3.2929
2.6456	4.09	3.68	13.15	54.71	1.93	0.2028	7.44	1.79	8.93	95.9467								4.0533	3.1113
2.7656	4.21	3.64	13.27	54.65	2.03	0.1659	7.42	1.81	8.53	95.7468								4.2532	2.9913
2.8615	4.11	3.61	13.28	54.71	1.99	0.1629	7.4	1.88	8.79	95.9652								4.0348	2.8954
2.9532	4.15	3.63	13.23	54.45	2.15	0.1882	7.32	1.78	8.96	95.8852								4.1148	2.8037
3.0748	4.18	3.57	13.2	54.31	2.3	0.1912	7.05	1.78	8.85	95.4615								4.5385	2.6821
3.1161	4.23	3.62	13.19	54.53	2.21	0.1687	7.19	1.85	8.99	95.9978								4.0022	2.6408
3.1947	4.42	3.55	13.26	54.37	2.26	0.1924	7.2	1.87	8.49	95.6277								4.3723	2.5622
3.2551	4.12	3.39	13.14	54.57	2.34	0.1736	7.12	1.86	8.36	95.0736								4.9264	2.5018
3.348	4.37	3.19	13.3	54.89	2.65	0.1315	6.18	1.88	8.37	94.9741								5.0259	2.4089
3.3707	4.31	3.09	13.21	55.23	2.65	0.1514	6.22	1.81	8.11	94.7967								5.2033	2.3862
3.3911	4.56	2.88	13.05	56.42	2.81	0.1178	5.81	1.78	8.09	95.5296								4.4704	2.3658
3.4049	4.56	2.69	12.92	57.37	3.03	0.1574	5.33	1.5637	7.42	95.0564								4.9436	2.352
3.4228	4.67	2.51	12.86	58.79	3.27	0.0708	4.63	1.301	6.95	95.0585								4.9415	2.3341
3.4375	4.73	2.23	12.65	61.63	3.42	0.061	4.08	0.9886	6.1	95.9087								4.0913	2.3194
3.4702	4.73	1.4986	12.06	66.89	3.9	0.065	2.64	0.4007	4.44	96.6243								3.3757	2.2867
3.5029	4.65	0.739	11.99	71.06	4.18	0.0395	1.54	0.0283	2.01	96.2368								3.7632	2.254
3.5624	4.69	0.0462	12.58	74.04	4.64	0.0125	0.4561	0	0.0178	96.4849								3.5151	2.1945
3.6534	4.82	0.0085	12.39	73.06	4.76	0	0.0803	0.0181	0.0462	95.186								4.814	2.1035
3.9179	5.53	0	12.48	73.63	4.89	0.0004	0.0164	0	0.0676	96.6305								3.3695	1.839
4.2779	5.58	0	12.48	73.26	4.98	0.0189	0.0164	0	0.0143	96.3557								3.6443	1.479
4.4697	5.71	0	12.43	73.4	4.88	0	0	0	0.114	96.534								3.466	1.2872
4.9715	5.58	0	12.23	73	4.88	0.0024	0.0384	0	0.0499	95.7807								4.2193	0.7854
5.309	5.38	0	12.36	73.46	5.01	0.0061	0.0067	0.0138	0.0428	96.2794								3.7206	0.4479
5.7569	5.27	0	12.75	74.14	4.97	0.0136	0.0233	0	0.0641	97.231								2.769	0
MI_6	Profile from basalt (0.00) ro rhyolite (8.17)
distance [mm]	Na2O(Mass%)	MgO(Mass%)	Al2O3(Mass%)	SiO2(Mass%)	K2O(Mass%)	MnO(Mass%)	CaO(Mass%)	TiO2(Mass%)	FeO(Mass%)	Total(Mass%)								H2O(Mass%) by difference	distance [mm]
0	3.1	3.83	13.63	54.11	1.48	0.1198	7.39	1.95	9.88	95.5137								4.4863	8.1717			Rhyolite	Hybrid	Basalt
0.5861	3.03	3.92	13.57	54.65	1.5	0.1913	7.64	1.91	9.86	96.2713								3.7287	7.5856		Mean	4.69705	5.18629	4.68377
1.2048	2.95	3.71	13.48	54.17	1.42	0.1846	7.71	1.95	9.76	95.3589								4.6411	6.9669		Min	3.9886	4.0556	3.7287
2.0652	3.07	3.78	13.71	54.43	1.52	0.2258	7.68	1.87	9.27	95.5653								4.4347	6.1065		Max	5.2221	5.8642	5.3828
2.8314	3.13	3.81	13.32	53.96	1.43	0.1475	7.56	1.87	9.8	95.0277								4.9723	5.3403
3.5482	3.4	3.7	13.4	53.39	1.45	0.1953	7.61	1.92	10.17	95.2512								4.7488	4.6235
3.8001	3.49	3.73	13.21	53.45	1.54	0.1542	7.52	1.88	10.07	95.0458								4.9542	4.3716
4.0934	3.55	3.67	13.24	52.98	1.7	0.1797	7.36	1.9	10.75	95.3452								4.6548	4.0783
4.399	3.74	3.61	12.96	52.79	1.99	0.1855	7.03	1.92	10.91	95.166								4.834	3.7727
4.6015	3.76	3.59	12.97	52.54	2.17	0.188	6.76	1.88	10.74	94.6172								5.3828	3.5702
4.8098	3.91	3.54	13.02	52.75	2.38	0.1606	6.47	1.92	10.51	94.6736								5.3264	3.3619
4.8652	3.85	3.39	13.08	53.12	2.44	0.127	6.44	1.92	10.43	94.797								5.203	3.3065
4.9577	3.98	3.21	13.12	53.83	2.56	0.1929	6.11	1.8	9.77	94.5868								5.4132	3.214
5.0242	4.13	3.02	13.2	54.82	2.8	0.1756	5.75	1.69	9.24	94.8273								5.1727	3.1475
5.0585	4.04	2.82	13.03	55.53	2.88	0.1543	5.36	1.5759	8.74	94.1358								5.8642	3.1132
5.0816	4.31	2.82	13.14	56.07	2.98	0.1795	5.32	1.5458	8.55	94.9153								5.0847	3.0901
5.1052	4.3	2.66	12.99	57.51	3.01	0.1633	5.05	1.4557	8.07	95.2163								4.7837	3.0665
5.1309	4.29	2.64	13.01	57.54	3.17	0.1416	4.79	1.3187	7.8	94.7225								5.2775	3.0408
5.1538	4.34	2.42	12.68	58.71	3.24	0.113	4.45	1.2101	7.27	94.4461								5.5539	3.0179
5.1798	4.3	2.21	12.69	59.44	3.36	0.1293	4.19	1.005	7.02	94.3443								5.6557	2.9919
5.2066	4.28	2.05	12.66	61.02	3.44	0.1468	3.76	0.8522	6.58	94.8025								5.1975	2.9651
5.2341	4.27	1.85	12.24	62.39	3.58	0.1096	3.4	0.7231	5.64	94.2156								5.7844	2.9376
5.2692	4.41	1.6247	11.95	65.18	3.79	0.0789	2.79	0.4736	4.92	95.2195								4.7805	2.9025
5.2945	4.3	1.4097	11.89	66.35	3.89	0.0763	2.45	0.2663	3.98	94.6123								5.3877	2.8772
5.3166	4.34	1.1986	11.82	67.86	3.96	0.0569	2.1	0.1464	3.52	95.0019								4.9981	2.8551
5.3706	4.44	0.6608	12.29	71.35	4.28	0.0374	1.3117	0.0145	1.56	95.9444								4.0556	2.8011
5.4524	4.61	0.1753	12.44	72.39	4.5	0.0294	0.8653	0	0.3607	95.3719								4.6281	2.7193
5.5291	4.68	0.0277	12.79	72.99	4.64	0	0.5635	0.0081	0.0438	95.7431								4.2569	2.6426
5.6083	4.94	0	12.68	73.28	4.71	0	0.362	0.0192	0.0168	96.0114								3.9886	2.5634
5.7013	5	0	12.65	73.05	4.88	0	0.251	0.0054	0.0742	95.9138								4.0862	2.4704
5.8154	5.35	0	12.46	72.13	4.76	0.0157	0.1092	0	0.0236	94.8493								5.1507	2.3563
5.9577	5.58	0.0049	12.52	72.48	4.96	0	0.0194	0.0132	0.0034	95.5809								4.4191	2.214
6.1965	5.85	0	12.28	71.87	4.87	0	0.0104	0.0029	0	94.8897								5.1103	1.9752
6.5339	6	0.0136	12.09	71.63	4.97	0	0	0	0.0673	94.7779								5.2221	1.6378
6.8709	6.12	0.0192	12.39	71.54	4.92	0	0.0119	0.0077	0.0168	95.0256								4.9744	1.3008
7.3809	6.02	0	12.36	71.81	4.97	0.0228	0	0	0.0101	95.1956								4.8044	0.7908
8.1717	6.08	0.0239	12.25	71.7	4.95	0.0155	0.0119	0.0109	0	95.0422								4.9578	0

## Sheet: FTIR Absorptions
Absorptions
Bruker Vertex v80 FTIR spectrometer
Hyperion 3000 IR microscope
the near-infrared range (4000-6000 cm-1)
knife-edge aperture 50 x 50 μm
spectral resolution of 4 cm-1
Rhyolite samples													Hybrid region
MI_Rt_1	vertical
Nr.	5210 H2O [cm-1]	4470 OH- [cm-1]	sample thickness [mm]	H2O [wt%]	abs. error H2O [wt%]	OH [wt%]	abs. error OH- [wt%]	cH2Ot [wt%]	abs. error cH2Ot [wt%]	Position [mm ]
0	0.186	0.072	0.293	3.3293	0.109587	1.21581	0.0899116	4.54511	0.141751	0.04
1	0.186	0.074	0.293	3.3293	0.109587	1.24958	0.0902104	4.57888	0.141941	0.412
2	0.173	0.074	0.293	3.09661	0.107097	1.24958	0.0902104	4.34619	0.140028	0.824
3	0.166	0.074	0.293	2.97131	0.105809	1.24958	0.0902104	4.2209	0.139045	1.236
4	0.17	0.072	0.293	3.04291	0.10654	1.21581	0.0899116	4.25872	0.139409	1.648
5	0.165	0.076	0.293	2.95341	0.105628	1.28336	0.0905163	4.23677	0.139106	2.06
6	0.164	0.074	0.293	2.93551	0.105447	1.24958	0.0902104	4.1851	0.13877	2.472
7	0.162	0.073	0.293	2.89971	0.105089	1.2327	0.0900601	4.13241	0.1384	2.884
8	0.163	0.073	0.293	2.91761	0.105268	1.2327	0.0900601	4.15031	0.138536	3.296
9	0.164	0.071	0.293	2.93551	0.105447	1.19893	0.0897649	4.13444	0.138481	3.708
10	0.161	0.07	0.293	2.88181	0.104912	1.18204	0.08962	4.06385	0.137979	4.12
11	0.165	0.073	0.293	2.95341	0.105628	1.2327	0.0900601	4.18611	0.138809	4.532
12	0.172	0.076	0.293	3.07871	0.106911	1.28336	0.0905163	4.36206	0.140083	4.944
13	0.169	0.075	0.293	3.02501	0.106356	1.26647	0.0903625	4.29148	0.13956	5.356
14	0.169	0.074	0.293	3.02501	0.106356	1.24958	0.0902104	4.27459	0.139462	5.768
15	0.166	0.073	0.293	2.97131	0.105809	1.2327	0.0900601	4.20401	0.138947	6.18
16	0.17	0.074	0.293	3.04291	0.10654	1.24958	0.0902104	4.29249	0.139602	6.592
17	0.167	0.071	0.293	2.98921	0.10599	1.19893	0.0897649	4.18814	0.138895	7.004
18	0.166	0.071	0.293	2.97131	0.105809	1.19893	0.0897649	4.17024	0.138756	7.416
19	0.169	0.072	0.293	3.02501	0.106356	1.21581	0.0899116	4.24082	0.139269	7.828
20	0.165	0.073	0.293	2.95341	0.105628	1.2327	0.0900601	4.18611	0.138809	8.24
21	0.164	0.071	0.293	2.93551	0.105447	1.19893	0.0897649	4.13444	0.138481	8.652
22	0.17	0.076	0.293	3.04291	0.10654	1.28336	0.0905163	4.32627	0.1398	9.064
MI_T_3	top left - bottom right												MI_T_3
Nr.	5210 H2O [cm-1]	4470 OH- [cm-1]	sample thickness [mm]	H2O [wt%]	abs. error H2O [wt%]	OH [wt%]	abs. error OH- [wt%]	cH2Ot [wt%]	abs. error cH2Ot [wt%]	Position [mm ]			Nr.	5210 H2O [cm-1]	4470 OH- [cm-1]	sample thickness [mm]	H2O [wt%]	abs. error H2O [wt%]	OH [wt%]	abs. error OH- [wt%]	cH2Ot [wt%]	abs. error cH2Ot [wt%]	Position [mm ]	Absorption	ε5210 (H2O) [l·mol-1·cm-1]	ε4470 (OH) [l·mol-1·cm-1]	Density [g·cm-3]	cSiO2 [wt%]
0	0.111	0.055	0.21	2.7493	0.137166	1.28516	0.121989	4.03446	0.183564	0.31			1	0.11	0.045	0.211	2.62833	0.13162	1.27497	0.147302	3.9033	0.197539	0.007	< 1	1.55089	1.30793	2.304	74.8
1	0.116	0.057	0.21	2.87315	0.138329	1.33189	0.122362	4.20504	0.184682	0.63			2	0.111	0.05	0.211	2.6273	0.130593	1.40332	0.147197	4.03062	0.196778	0.073	< 1	1.55089	1.30793	2.32586	74.8
2	0.117	0.056	0.21	2.89791	0.138567	1.30852	0.122174	4.20644	0.184735	0.94			3	0.112	0.051	0.211	2.68107	0.132563	1.44771	0.149387	4.12878	0.199723	0.244	< 1	1.51921	1.28114	2.34771	74.1
3	0.114	0.056	0.21	2.82361	0.137859	1.30852	0.122174	4.13213	0.184205	1.25			4	0.103	0.045	0.211	2.56319	0.136438	1.3281	0.154118	3.89129	0.205834	0.318	< 1	1.4479	1.22086	2.36957	72.5
4	0.119	0.058	0.21	2.94745	0.139046	1.35526	0.122553	4.30271	0.185346	1.56			5	0.104	0.046	0.211	2.60392	0.137708	1.36598	0.15553	3.9699	0.207733	0.324	< 1	1.42594	1.20229	2.39143	72
5	0.117	0.055	0.21	2.89791	0.138567	1.28516	0.121989	4.18307	0.184613	1.88			6	0.105	0.048	0.211	2.61558	0.137294	1.41813	0.155397	4.03371	0.207359	0.332	< 1	1.42025	1.19748	2.41329	71.87
6	0.111	0.057	0.21	2.7493	0.137166	1.33189	0.122362	4.0812	0.183813	2.19			7	0.1	0.049	0.21	2.71541	0.149873	1.57847	0.171184	4.29388	0.227521	0.354	< 1	1.29734	1.09358	2.43514	69
7	0.11	0.055	0.21	2.72454	0.136939	1.28516	0.121989	4.00969	0.183394	2.5			8	0.093	0.049	0.21	2.87438	0.171163	1.79743	0.197942	4.67181	0.261683	0.378	< 1	1.12966	0.95182	2.457	64.88
8	0.116	0.056	0.21	2.87315	0.138329	1.30852	0.122174	4.18167	0.184557	2.81			9	0.09	0.048	0.21	2.86499	0.176089	1.81373	0.204284	4.67871	0.269702	0.397	< 1	1.08741	0.916103	2.47822	63.8
9	0.113	0.054	0.21	2.79884	0.137626	1.26179	0.121807	4.06063	0.183788	3.13			10	0.088	0.047	0.209	2.83109	0.177607	1.79491	0.206236	4.626	0.272172	0.412	< 1	1.07195	0.903027	2.49944	63.4
10	0.114	0.057	0.21	2.82361	0.137859	1.33189	0.122362	4.1555	0.18433	3.44			11	0.089	0.047	0.209	3.07269	0.1931	1.92675	0.223792	4.99944	0.295585	0.425	< 1	0.990475	0.834152	2.52067	61.25
11	0.107	0.061	0.21	2.65023	0.136266	1.42536	0.123145	4.07559	0.183666	3.75			12	0.088	0.045	0.209	3.11155	0.198277	1.88956	0.228713	5.00111	0.302694	0.448	< 1	0.959041	0.807577	2.54189	60.4
12	0.106	0.063	0.21	2.62546	0.136045	1.47209	0.123554	4.09755	0.183777	4.06			13	0.082	0.045	0.208	3.12454	0.213259	2.03694	0.249558	5.16148	0.328267	0.474	> 1	0.88681	0.746514	2.56311	58.4
13	0.095	0.053	0.21	2.35301	0.133732	1.23843	0.121628	3.59143	0.18077	4.38			14	0.081	0.043	0.208	3.17461	0.220085	2.00233	0.256203	5.17694	0.337753	0.509	> 1.5	0.8551	0.719706	2.58433	57.5
14	0.103	0.059	0.21	2.55116	0.135393	1.37862	0.122747	3.92978	0.182752	4.46			15	0.104	0.05	0.208	4.21715	0.245051	2.40935	0.275604	6.6265	0.368792	0.541	> 1.5	0.819757	0.689828	2.60556	56.48
													16	0.117	0.062	0.208	4.72574	0.25443	2.97597	0.29178	7.70171	0.387131	0.575	> 1.5	0.816326	0.686927	2.62678	56.38
MI_T_3	top right - bottom left												17	0.105	0.084	0.208	4.3485	0.253524	4.13476	0.342254	8.48327	0.425925	0.608	> 1.5	0.789773	0.66448	2.648	55.6
Nr.	5210 H2O [cm-1]	4470 OH- [cm-1]	sample thickness [mm]	H2O [wt%]	abs. error H2O [wt%]	OH [wt%]	abs. error OH- [wt%]	cH2Ot [wt%]	abs. error cH2Ot [wt%]	Position [mm ]
15	0.102	0.057	0.21	2.52639	0.13518	1.33189	0.122362	3.85828	0.182335	0.31
16	0.115	0.056	0.21	2.84838	0.138093	1.30852	0.122174	4.1569	0.184381	0.61
17	0.116	0.055	0.21	2.87315	0.138329	1.28516	0.121989	4.1583	0.184435	0.97
18	0.113	0.056	0.21	2.79884	0.137626	1.30852	0.122174	4.10737	0.184031	1.45
19	0.115	0.055	0.21	2.84838	0.138093	1.28516	0.121989	4.13354	0.184258	1.79
20	0.108	0.056	0.21	2.675	0.136489	1.30852	0.122174	3.98352	0.183182	2.09
21	0.119	0.056	0.21	2.94745	0.139046	1.30852	0.122174	4.25598	0.185096	2.42
22	0.112	0.044	0.21	2.77407	0.137395	1.02813	0.120158	3.8022	0.182525	2.76
23	0.11	0.056	0.21	2.72454	0.136939	1.30852	0.122174	4.03306	0.183518	3.02
24	0.112	0.056	0.21	2.77407	0.137395	1.30852	0.122174	4.0826	0.183859	3.28
25	0.113	0.054	0.21	2.79884	0.137626	1.26179	0.121807	4.06063	0.183788	3.47
26	0.115	0.055	0.21	2.84838	0.138093	1.28516	0.121989	4.13354	0.184258	4.21
27	0.11	0.057	0.21	2.72454	0.136939	1.33189	0.122362	4.05643	0.183643	4.8
28	0.112	0.057	0.21	2.77407	0.137395	1.33189	0.122362	4.10596	0.183984	5.24
29	0.087	0.071	0.21	2.15486	0.132187	1.65902	0.125308	3.81388	0.182141	5.65
MI_5	4 profiles left - right												MI_5
Nr.	5210 H2O [cm-1]	4470 OH- [cm-1]	sample thickness [mm]	H2O [wt%]	abs. error H2O [wt%]	OH [wt%]	abs. error OH- [wt%]	cH2Ot [wt%]	abs. error cH2Ot [wt%]	Position [mm ]			Nr.	5210 H2O [cm-1]	4470 OH- [cm-1]	sample thickness [mm]	H2O [wt%]	abs. error H2O [wt%]	OH [wt%]	abs. error OH- [wt%]	cH2Ot [wt%]	abs. error cH2Ot [wt%]	Position [mm ]	Absorption	ε5210 (H2O) [l·mol-1·cm-1]	ε4470 (OH) [l·mol-1·cm-1]	Density [g·cm-3]	cSiO2 [wt%]
0	0.183	0.066	0.236	4.05965	0.138511	1.38126	0.110866	5.44091	0.177416	0.307556			0	0.164	0.059	0.225	3.81037	0.141232	1.62567	0.147664	5.43604	0.204331	0.0451684	< 1	1.47002	1.23955	2.34426	73
1	0.178	0.065	0.2355	3.95712	0.137496	1.36322	0.110924	5.32034	0.176662	0.707378			1	0.162	0.061	0.225	3.75136	0.14029	1.67519	0.147881	5.42655	0.203838	0.109262	< 1	1.46558	1.2358	2.35922	72.9
2	0.18	0.064	0.236	3.9931	0.137701	1.3394	0.110504	5.3325	0.176558	0.2768			2	0.16	0.062	0.225	3.69288	0.139361	1.69707	0.147784	5.38995	0.20313	0.150591	< 1	1.46115	1.23206	2.37417	72.8
3	0.174	0.062	0.235	3.87642	0.136762	1.30307	0.110631	5.17949	0.175906	0.676622			3	0.156	0.063	0.225	3.58345	0.137656	1.71626	0.14745	5.2997	0.20172	0.201951	< 1	1.45894	1.23019	2.38912	72.75
4	0.17	0.061	0.234	3.80349	0.136366	1.28753	0.110941	5.09102	0.175794	1.07644			4	0.152	0.066	0.225	3.473	0.135889	1.78843	0.14773	5.26143	0.200724	0.245081	< 1	1.45761	1.22907	2.40408	72.72
5	0.153	0.062	0.23	3.48268	0.134618	1.3314	0.113093	4.81407	0.175818	1.95298			5	0.147	0.067	0.225	3.34002	0.133857	1.8054	0.147274	5.14543	0.199016	0.296616	< 1	1.45673	1.22832	2.41903	72.7
6	0.128	0.061	0.229	2.92634	0.129339	1.31564	0.113418	4.24198	0.172025	2.33742			6	0.14	0.066	0.225	3.27987	0.137028	1.83393	0.152269	5.1138	0.204848	0.348052	< 1	1.40412	1.18385	2.43398	71.5
7	0.172	0.065	0.235	3.83186	0.136235	1.36612	0.111166	5.19799	0.175834	0.353689			7	0.137	0.065	0.225	3.31201	0.141477	1.86397	0.157592	5.17598	0.211781	0.364513	< 1	1.3524	1.14012	2.44893	70.3
8	0.172	0.064	0.234	3.84824	0.136892	1.35085	0.111471	5.19909	0.176537	0.876533			8	0.133	0.064	0.225	3.2366	0.141603	1.84751	0.158516	5.0841	0.212553	0.381049	< 1	1.33535	1.1257	2.46389	69.9
9	0.162	0.063	0.23	3.68754	0.136923	1.35287	0.113274	5.04041	0.177705	1.64542			9	0.13	0.062	0.225	3.3661	0.151558	1.90472	0.169508	5.27082	0.227382	0.398186	< 1	1.24744	1.05139	2.47884	67.8
10	0.136	0.062	0.229	3.10923	0.131152	1.33721	0.113598	4.44644	0.173509	2.09138			10	0.126	0.06	0.225	3.50362	0.163756	1.97998	0.183279	5.4836	0.245778	0.41915	< 1	1.15463	0.972931	2.49379	65.51
11	0.169	0.067	0.23	3.84688	0.138779	1.43877	0.114025	5.28565	0.179614	1.19947			11	0.121	0.056	0.225	3.9657	0.197997	2.17947	0.219959	6.14517	0.295948	0.44772	< 1	0.973779	0.820036	2.50875	60.8
12	0.133	0.066	0.229	3.04065	0.130462	1.42348	0.114343	4.46413	0.173478	1.87609			12	0.109	0.05	0.225	4.3414	0.245195	2.36688	0.272197	6.70828	0.366349	0.512465	> 1	0.796547	0.670205	2.5237	55.8
MI_5	top - bottom
Nr.	5210 H2O [cm-1]	4470 OH- [cm-1]	sample thickness [mm]	H2O [wt%]	abs. error H2O [wt%]	OH [wt%]	abs. error OH- [wt%]	cH2Ot [wt%]	abs. error cH2Ot [wt%]	Position [mm ]
14	0.14	0.068	0.225	3.25758	0.131562	1.49269	0.113116	4.75027	0.173504	0.445956
15	0.16	0.066	0.225	3.72295	0.135881	1.44879	0.112924	5.17174	0.176679	0.815022
16	0.167	0.066	0.225	3.88583	0.137493	1.44879	0.112924	5.33462	0.177922	1.07644
17	0.167	0.066	0.219	3.99229	0.141816	1.48848	0.116112	5.48077	0.183286	3.70604
18	0.149	0.07	0.219	3.56198	0.137564	1.57869	0.116523	5.14068	0.180282	4.0136
19	0.144	0.074	0.225	3.35065	0.132391	1.6244	0.113724	4.97505	0.174529	0.861156
20	0.151	0.075	0.225	3.51353	0.133884	1.64635	0.11383	5.15988	0.175733	1.26098
MI_6	left - right												MI_6
Nr.	5210 H2O [cm-1]	4470 OH- [cm-1]	sample thickness [mm]	H2O [wt%]	abs. error H2O [wt%]	OH [wt%]	abs. error OH- [wt%]	cH2Ot [wt%]	abs. error cH2Ot [wt%]	Position [mm ]			Nr.	5210 H2O [cm-1]	4470 OH- [cm-1]	sample thickness [mm]	H2O [wt%]	abs. error H2O [wt%]	OH [wt%]	abs. error OH- [wt%]	cH2Ot [wt%]	abs. error cH2Ot [wt%]	Position [mm ]	Absorption	ε5210 (H2O) [l·mol-1·cm-1]	ε4470 (OH) [l·mol-1·cm-1]	Density [g·cm-3]	cSiO2 [wt%]
0	0.138	0.059	0.2	3.59518	0.152266	1.45007	0.129279	5.04525	0.199744	0.319329			0	0.123	0.05	0.2	3.28346	0.152445	1.58299	0.167189	4.86645	0.226256	0.121802	< 1	1.4391	1.21341	2.3447	72.3
1	0.118	0.054	0.2	3.07414	0.146674	1.32718	0.128263	4.40132	0.194845	0.632957			1	0.117	0.054	0.2	3.05275	0.146946	1.67092	0.164453	4.72367	0.22054	0.333526	< 1	1.47224	1.24143	2.34488	73.05
2	0.12	0.052	0.205	3.05	0.143261	1.24685	0.124693	4.29685	0.189927	1.30982			2	0.108	0.058	0.205	2.82954	0.145358	1.80222	0.167005	4.63176	0.221404	0.61496	< 1	1.43032	1.20599	2.34507	72.1
3	0.123	0.056	0.201	3.18846	0.147196	1.36949	0.128003	4.55795	0.195068	1.63691			3	0.1	0.056	0.201	3.0586	0.170061	2.03219	0.197324	5.09078	0.260494	0.713614	< 1	1.24991	1.05348	2.34442	67.86
4	0.126	0.055	0.201	3.26623	0.14801	1.34503	0.127805	4.61126	0.195553	2.33783			4	0.098	0.056	0.201	3.08452	0.174929	2.09142	0.203858	5.17594	0.268623	0.735518	< 1	1.21466	1.02367	2.34436	67
5	0.136	0.054	0.2	3.54308	0.151677	1.32718	0.128263	4.87026	0.198639	2.84488			5	0.095	0.053	0.2	3.19776	0.187475	2.11727	0.218035	5.31503	0.287552	0.761082	< 1	1.14152	0.961847	2.34421	65.18
6	0.139	0.053	0.199	3.63943	0.153427	1.30915	0.128728	4.94858	0.200277	3.04435			6	0.093	0.051	0.199	3.36275	0.202399	2.18907	0.235057	5.55182	0.310189	0.793348	< 1	1.06809	0.899771	2.34401	63.3
7	0.132	0.055	0.198	3.47361	0.152221	1.36541	0.12979	4.83902	0.200041	3.40234			7	0.09	0.049	0.198	3.32471	0.207984	2.14942	0.241692	5.47413	0.318861	0.827302	< 1	0.981926	0.826924	2.5083	61.02
													8	0.099	0.049	0.197	3.89663	0.2299	2.29087	0.261057	6.1875	0.347857	0.869647	> 1	0.908224	0.764617	2.55812	59
MI_6	top - bottom
Nr.	5210 H2O [cm-1]	4470 OH- [cm-1]	sample thickness [mm]	H2O [wt%]	abs. error H2O [wt%]	OH [wt%]	abs. error OH- [wt%]	cH2Ot [wt%]	abs. error cH2Ot [wt%]	Position [mm ]
8	0.13	0.055	0.198	3.42098	0.151641	1.36541	0.12979	4.78639	0.1996	0.233795
9	0.128	0.053	0.199	3.35142	0.150222	1.30915	0.128728	4.66057	0.197833	0.74016
10	0.132	0.054	0.2	3.43887	0.150519	1.32718	0.128263	4.76605	0.197756	1.08994
11	0.128	0.053	0.201	3.31807	0.148561	1.29612	0.127418	4.6142	0.195718	1.59836
12	0.122	0.057	0.201	3.16254	0.146928	1.39394	0.128205	4.55648	0.194998	2.43397
13	0.126	0.056	0.201	3.26623	0.14801	1.36949	0.128003	4.63572	0.195683	2.9546
14	0.115	0.058	0.201	2.98108	0.1451	1.4184	0.128409	4.39948	0.19376	3.36128
15	0.11	0.064	0.201	2.85147	0.143848	1.56513	0.129706	4.4166	0.19369	3.7211
MI_7	2 profiles left - right												MI_7
Nr.	5210 H2O [cm-1]	4470 OH- [cm-1]	sample thickness [mm]	H2O [wt%]	abs. error H2O [wt%]	OH [wt%]	abs. error OH- [wt%]	cH2Ot [wt%]	abs. error cH2Ot [wt%]	Position [mm ]			Nr.	5210 H2O [cm-1]	4470 OH- [cm-1]	sample thickness [mm]	H2O [wt%]	abs. error H2O [wt%]	OH [wt%]	abs. error OH- [wt%]	cH2Ot [wt%]	abs. error cH2Ot [wt%]	Position [mm ]	Absorption	ε5210 (H2O) [l·mol-1·cm-1]	ε4470 (OH) [l·mol-1·cm-1]	Density [g·cm-3]	cSiO2 [wt%]
0	0.137	0.064	0.2305	3.10359	0.130106	1.36779	0.11291	4.47138	0.172268	0.198276			0	0.135	0.058	0.2305	3.02407	0.128348	1.54074	0.141805	4.56481	0.191264	0.02	< 1	1.48782	1.2546	2.34507	73.4
1	0.143	0.062	0.2305	3.23952	0.131508	1.32504	0.112547	4.56456	0.173093	0.765426			1	0.128	0.056	0.2305	2.81727	0.124483	1.46165	0.13867	4.27892	0.186347	0.164957	< 1	1.49676	1.26216	2.37243	73.6
2	0.152	0.063	0.2305	3.4434	0.133694	1.34641	0.112727	4.78982	0.174875	1.5608			2	0.121	0.055	0.2305	2.64864	0.122445	1.42773	0.137711	4.07637	0.184275	0.303412	< 1	1.48782	1.2546	2.3998	73.4
3	0.152	0.06	0.2305	3.4434	0.133694	1.2823	0.112195	4.7257	0.174533	1.9113			3	0.118	0.057	0.2305	2.56924	0.121278	1.4718	0.13763	4.04104	0.18344	0.403412	< 1	1.4789	1.24707	2.42717	73.2
4	0.153	0.061	0.23	3.47359	0.134267	1.30651	0.11262	4.7801	0.175245	2.39655			4	0.116	0.061	0.23	2.48053	0.118617	1.54688	0.136207	4.0274	0.180617	0.563412	< 1	1.49228	1.25838	2.45453	73.5
5	0.154	0.063	0.23	3.49629	0.134518	1.34934	0.112978	4.84564	0.175668	3.01996			5	0.105	0.058	0.23	2.73818	0.145691	1.79472	0.169484	4.5329	0.223496	0.648598	< 1	1.21018	1.01989	2.4819	66.89
6	0.135	0.064	0.23	3.06493	0.129957	1.37076	0.113162	4.43569	0.172321	3.43103			6	0.102	0.053	0.23	2.90718	0.160641	1.79303	0.185283	4.70022	0.245225	0.667364	< 1	1.09518	0.922672	2.50927	64
7	0.132	0.066	0.233	2.95824	0.127465	1.3954	0.112036	4.35363	0.169704	0.239337			7	0.099	0.05	0.233	3.08275	0.178108	1.84893	0.204629	4.93168	0.271285	0.688421	< 1	0.962716	0.810684	2.57915	60.5
8	0.138	0.064	0.233	3.0927	0.128804	1.35311	0.111669	4.44581	0.170471	0.684437			8	0.101	0.051	0.233	3.46157	0.202161	2.07678	0.231654	5.53835	0.307462	0.713171	> 1	0.851607	0.716753	2.64904	57.4
9	0.155	0.06	0.232	3.48866	0.133475	1.27401	0.111453	4.76267	0.173889	1.34846
10	0.153	0.062	0.231	3.45855	0.13362	1.32218	0.112298	4.78073	0.174542	1.8573
11	0.153	0.06	0.23	3.47359	0.134267	1.28509	0.112444	4.75868	0.175132	2.45395
12	0.147	0.064	0.23	3.33737	0.132786	1.37076	0.113162	4.70813	0.174464	2.91447
13	0.133	0.066	0.23	3.01953	0.129504	1.4136	0.113536	4.43312	0.172226	3.57463
MI_7	2 profiles top - bottom
Nr.	5210 H2O [cm-1]	4470 OH- [cm-1]	sample thickness [mm]	H2O [wt%]	abs. error H2O [wt%]	OH [wt%]	abs. error OH- [wt%]	cH2Ot [wt%]	abs. error cH2Ot [wt%]	Position [mm ]
14	0.141	0.064	0.2305	3.19421	0.131036	1.36779	0.11291	4.562	0.172971	0.192377
15	0.151	0.063	0.231	3.41334	0.133125	1.3435	0.112477	4.75685	0.17428	0.460072
16	0.15	0.063	0.2315	3.38342	0.132561	1.3406	0.112229	4.72402	0.173689	0.821687
17	0.153	0.063	0.2315	3.45108	0.133299	1.3406	0.112229	4.79168	0.174252	1.13657
18	0.154	0.062	0.2315	3.47364	0.133547	1.31932	0.11205	4.79296	0.174327	1.42967
19	0.157	0.066	0.2315	3.54131	0.134298	1.40444	0.112781	4.94575	0.175373	1.73707
20	0.143	0.066	0.2315	3.22552	0.130882	1.40444	0.112781	4.62996	0.172771	2.13135
21	0.119	0.064	0.225	2.76172	0.129512	1.40122	0.115741	4.16294	0.173694	0.286524
22	0.119	0.065	0.225	2.76172	0.129512	1.42312	0.115933	4.18484	0.173822	0.620916
23	0.119	0.064	0.225	2.76172	0.129512	1.40122	0.115741	4.16294	0.173694	0.976859
24	0.122	0.063	0.226	2.81881	0.129539	1.37322	0.115028	4.19204	0.173239	1.576
25	0.12	0.063	0.227	2.76039	0.128492	1.36717	0.114508	4.12757	0.172112	2.17922
26	0.122	0.061	0.228	2.79409	0.128309	1.31797	0.11363	4.11205	0.171391	2.57441
27	0.132	0.061	0.229	3.00991	0.129895	1.31221	0.113123	4.32212	0.172248	3.24727
28	0.126	0.063	0.23	2.8606	0.127957	1.34934	0.112978	4.20995	0.170696	3.75952
29	0.144	0.064	0.23	3.26926	0.132062	1.37076	0.113162	4.64002	0.173914	4.38475
30	0.139	0.062	0.23	3.15575	0.13088	1.32792	0.112798	4.48367	0.17278	4.96665
31	0.132	0.064	0.23	2.99682	0.129279	1.37076	0.113162	4.36758	0.17181	5.52291
32	0.137	0.068	0.23	3.11034	0.130416	1.45643	0.113921	4.56677	0.173166	5.97572
Rt_1_h
Nr.	5210 H2O [cm-1]	4470 OH- [cm-1]	sample thickness [mm]	H2O [wt%]	abs. error H2O [wt%]	OH [wt%]	abs. error OH- [wt%]	cH2Ot [wt%]	abs. error cH2Ot [wt%]
0	0.063	0.019	0.072	4.54531	0.413871	1.29321	0.345871	5.83852	0.539366
1	0.063	0.019	0.072	4.54531	0.413871	1.29321	0.345871	5.83852	0.539366
2	0.061	0.019	0.072	4.40101	0.410752	1.29321	0.345871	5.69423	0.536977
3	0.061	0.019	0.072	4.40101	0.410752	1.29321	0.345871	5.69423	0.536977
4	0.06	0.019	0.072	4.32886	0.409222	1.29321	0.345871	5.62208	0.535807
5	0.06	0.019	0.072	4.32886	0.409222	1.29321	0.345871	5.62208	0.535807
6	0.061	0.019	0.072	4.40101	0.410752	1.29321	0.345871	5.69423	0.536977
7	0.062	0.019	0.072	4.47316	0.412302	1.29321	0.345871	5.76637	0.538163
8	0.064	0.019	0.072	4.61745	0.415459	1.29321	0.345871	5.91067	0.540585
9	0.066	0.02	0.072	4.76175	0.418691	1.36128	0.346465	6.12303	0.543452
10	0.062	0.019	0.072	4.47316	0.412302	1.29321	0.345871	5.76637	0.538163
11	0.062	0.019	0.072	4.47316	0.412302	1.29321	0.345871	5.76637	0.538163
12	0.06	0.018	0.072	4.32886	0.409222	1.22515	0.345306	5.55401	0.535443
13	0.059	0.019	0.072	4.25672	0.407712	1.29321	0.345871	5.54993	0.534654
14	0.058	0.019	0.072	4.18457	0.406221	1.29321	0.345871	5.47778	0.533518
15	0.057	0.019	0.072	4.11242	0.404751	1.29321	0.345871	5.40563	0.5324
16	0.057	0.019	0.072	4.11242	0.404751	1.29321	0.345871	5.40563	0.5324
17	0.058	0.019	0.072	4.18457	0.406221	1.29321	0.345871	5.47778	0.533518
18	0.06	0.018	0.072	4.32886	0.409222	1.22515	0.345306	5.55401	0.535443
19	0.061	0.019	0.072	4.40101	0.410752	1.29321	0.345871	5.69423	0.536977
Rt_3_h
Nr.	5210 H2O [cm-1]	4470 OH- [cm-1]	sample thickness [mm]	H2O [wt%]	abs. error H2O [wt%]	OH [wt%]	abs. error OH- [wt%]	cH2Ot [wt%]	abs. error cH2Ot [wt%]
0	0.171	0.053	0.2114	4.23303	0.153347	1.23773	0.121543	5.47076	0.195673
1	0.168	0.056	0.2114	4.15877	0.152415	1.30779	0.122086	5.46656	0.195283
2	0.166	0.052	0.2114	4.10926	0.1518	1.21437	0.121367	5.32363	0.194353
3	0.164	0.05	0.2114	4.05975	0.151189	1.16767	0.121026	5.22742	0.193664
4	0.17	0.055	0.2114	4.20828	0.153035	1.28444	0.121902	5.49271	0.195653
5	0.166	0.056	0.2114	4.10926	0.1518	1.30779	0.122086	5.41705	0.194803
6	0.166	0.054	0.2114	4.10926	0.1518	1.26108	0.121721	5.37034	0.194574
7	0.165	0.051	0.2114	4.0845	0.151494	1.19102	0.121195	5.27553	0.194007
Rt_4_h
Nr.	5210 H2O [cm-1]	4470 OH- [cm-1]	sample thickness [mm]	H2O [wt%]	abs. error H2O [wt%]	OH [wt%]	abs. error OH- [wt%]	cH2Ot [wt%]	abs. error cH2Ot [wt%]
0	0.151	0.057	0.248	3.18213	0.123193	1.13321	0.103752	4.31534	0.161062
1	0.151	0.059	0.248	3.18213	0.123193	1.17297	0.104056	4.3551	0.161258
2	0.151	0.059	0.248	3.18213	0.123193	1.17297	0.104056	4.3551	0.161258
3	0.151	0.058	0.248	3.18213	0.123193	1.15309	0.103903	4.33522	0.161159
4	0.151	0.059	0.248	3.18213	0.123193	1.17297	0.104056	4.3551	0.161258
5	0.15	0.059	0.248	3.16106	0.122975	1.17297	0.104056	4.33403	0.161091
6	0.15	0.06	0.248	3.16106	0.122975	1.19285	0.104211	4.35391	0.161192
7	0.151	0.057	0.248	3.18213	0.123193	1.13321	0.103752	4.31534	0.161062
8	0.153	0.056	0.248	3.22428	0.123633	1.11333	0.103604	4.33761	0.161304
9	0.153	0.059	0.248	3.22428	0.123633	1.17297	0.104056	4.39725	0.161595
Rt_5_h
Nr.	5210 H2O [cm-1]	4470 OH- [cm-1]	sample thickness [mm]	H2O [wt%]	abs. error H2O [wt%]	OH [wt%]	abs. error OH- [wt%]	cH2Ot [wt%]	abs. error cH2Ot [wt%]
0	0.173	0.057	0.232	3.90568	0.138557	1.214	0.111288	5.11969	0.177716
1	0.171	0.058	0.2315	3.86887	0.138357	1.23797	0.111699	5.10684	0.177819
2	0.171	0.057	0.231	3.87724	0.138696	1.21926	0.111779	5.0965	0.178133
3	0.17	0.059	0.231	3.85457	0.138428	1.26204	0.112116	5.11661	0.178135
4	0.171	0.057	0.2305	3.88565	0.139037	1.2219	0.112027	5.10756	0.178553
5	0.173	0.058	0.23	3.93965	0.139924	1.24604	0.112443	5.18569	0.179505
6	0.17	0.056	0.234	3.80515	0.136425	1.18251	0.110157	4.98766	0.175346
7	0.169	0.056	0.235	3.76667	0.135511	1.17748	0.109679	4.94415	0.174335
8	0.169	0.058	0.236	3.75071	0.134865	1.21436	0.109527	4.96508	0.173737
9	0.169	0.059	0.233	3.799	0.136822	1.25121	0.111133	5.05021	0.176269
10	0.17	0.058	0.231	3.85457	0.138428	1.24065	0.111946	5.09522	0.178029
11	0.173	0.062	0.2305	3.9311	0.139579	1.32909	0.112891	5.26019	0.179518
12	0.174	0.061	0.23	3.96242	0.140197	1.31049	0.112963	5.27291	0.180044
13	0.175	0.059	0.229	4.00259	0.14117	1.27306	0.113116	5.27566	0.180899

## Sheet: Natural bimodal volcanic system
Samples of bimodal volcnamism
Table modified according to Allabar et al. (2022)
Natural bimodal volcanic systems of rhyolitic and basaltic or andesitic compositions, analyzed for alkali/alumina ratio, and excess alkali content.
Publication	Location	Type/ Sample	SiO2	TiO2	Al2O3	Fe2O3	FeO	MnO	MgO	CaO	Na2O	K2O	P2O5	(Na2O+K2O)/Al2O3 [mol%]	excess alkali [mol%]
INPUTS														OUTPUTS
De Rosa et al. 2002	Salina Island, southern tyrrhenian sea, Itlay	Rhyolite Poll II3d	75.96	0.28	13.06		0.94	0.18	0.22	1.1	3.73	4.29	0	0.825491	-0.0144928
	Salina Island, southern tyrrhenian sea, Itlay	Andesite Poll II2b	61.71	0.94	15.96		5.9	0.09	2.36	6.12	3.44	2.56	0.43	0.528262	-0.0481928
Smithies et al. 2015	Mount Palgrave	Rhyolite 187077	71.7	0.27	12.11	1.09		0.12	0.09	1.17	2.54	6.4	0.04	0.91718	-0.00675418
		Rhyolite 195670	74.99	0.19	11.79	2.99		0.04	0.09	0.61	3.53	5.12	0.02	0.962707	-0.00285576
		Basalt 194662	48.29	2.84	11.33	16.13		0.31	4.8	11.31	1.4	0.71	0.64	0.271139	-0.0573911
		Basalt 195640	50.79	2.52	16.71	12.54		0.18	2.59	8.5	3.8	1.44	0.72	0.467443	-0.0614909
Smithies et al. 2015	Pussy Cat*	Rhyolite 195619	75.43	0.13	11.75	1.94		0.02	0.8	0.75	1.8	7.74	0.01	0.965111	-0.00262905
		Rhyolite 195723	73.11	0.19	11.94	2.11		0.03	0.37	0.67	3.16	5.19	0.03	0.905974	-0.00745276
		Andesite 195122	60.7	1.5	13.45	9		0.16	1.5	3.06	2.02	5.8	0.61	0.713903	-0.0267684
		Andesite 195123	62.6	1.45	12.7	8.58		0.14	1.23	3.2	1.21	6.06	0.6	0.673286	-0.0287388
		Basalt 183615	46.85	1.15	14.88	12.86		0.19	8.29	9.71	1.78	0.81	0.16	0.255744	-0.0753944
		Basalt 194665	46.1	3.87	12.87	13.73		0.17	5	8.98	1.64	1.88	1.3	0.367785	-0.0582436
Sparks and Sigurdsson 1977	Askja	Rhyolite	73.72	0.83	12.92		3.12	0.07	0.57	2.14	3.59	2.53	0.12	0.669147	-0.0271095
		Basalt	50.98	1.89	13.81		13.31	0.3	6.18	10.82	2.47	0.3	0.21	0.317789	-0.0581904
Saito et al. 2002	Satsuma-Iwojima	Rhyolite S-1	71.9	0.59	13.84		3.07	0.1	0.85	2.82	4.28	2.42	0.12	0.69809	-0.0264227
		Rhyolite S-2	73.42	0.56	13.37		2.62	0.09	0.65	2.29	4.33	2.56	0.1	0.740118	-0.0219487
		Rhyolite S-3	69.55	0.66	14.15		3.85	0.12	1.16	3.51	4.32	2.15	0.12	0.666792	-0.0299363
		Rhyolite S-4	70.09	0.62	14.15		3.6	0.11	1.14	3.42	4.52	2.2	0.14	0.693872	-0.0273852
		Basalt to B-And. SM-1b	56.38	0.66	17.07		7.81	0.15	4.84	9.33	2.79	0.84	0.13	0.322186	-0.0724532
		Basalt to B-And. SM-2	61.04	0.78	16.36		6.67	0.13	3	6.7	3.6	1.37	0.14	0.452698	-0.0567149
		Basalt to B-And. SM-3	58.62	0.88	16.36		8.61	0.16	3.03	7.48	3.42	1.28	0.17	0.428641	-0.0592308
Leat et al. 1986	Parys Mt.	Rhyolite P5	72.6	0.14	8.63		6.41	0.08	6.02	0.1	0.18	0.53	0.05	0.100797	-0.0492564
		Basalt P2	60.3	1.65	10.47		15.78	0.16	4.08	0.44	0.27	0.21	0.42	0.0641411	-0.0654853
Leat et al. 1986	Snowdon*	Acid S11	75.5	0.31	11		3.01	0.04	1.67	0.1	3	3.66	0.05	0.808896	-0.0133729
		Acid SR8	71.1	0.45	13.98		3.73	0.03	1.5	0.29	3.53	4.09	0.05	0.732142	-0.0241363
		Basic LY34	49	2.49	14.99		11.35	0.19	5.44	5.89	5.27	0.74	0.37	0.631877	-0.0363243
	Avoca*	Basic 1137A	46.5	3.56	17.99		10.28	0	4.67	6.12	4.57	1.3	0	0.496182	-0.0612807
		Acid SR36	74.9	0.21	9.9		2.76	0.02	2.76	0.1	0.26	7.91	0.05	0.908111	-0.005779
		Acid SR40	75.3	0.26	12.03		1.12	0.02	0.3	0.1	0.26	10	0.07	0.935387	-0.00504691
Jahn et al. 2009		Rhyolite	75.2	0.21	12.8	1.83	0.57	0.02	0.2	0.2	4.25	4.23	0.04	0.904025	-0.00791731
		Basalt	51.7	1.47	17.4	4.37	5.2	0.16	3.81	8.34	4.6	1.86	0.36	0.550682	-0.0514157
Ngounouno et al. 2000	Kapski plateau (Africa)	Rhyolite 1A	71.34	0.1	11	5.27		0.05	0.13	0.35	3.74	3.8	0.01	0.933358	-0.00499112
		Rhyolite 1C	69.93	0.24	15.57	1.67		0	0.02	0.22	5.76	5.07	0.07	0.961158	-0.0040028
		Rhyolite 2S	71	0.27	11.76	4.41		0.22	0.44	0.38	4.46	4.41	0.02	1.02992	0.00235125
		Rhyolite 3A	68.17	0.2	14.39	3.47		0.17	0.32	0.34	6.35	4.66	0.34	1.07659	0.00734969
		Basalt 2J	41.48	3.58	12.76	13.68		0.17	11.28	11.32	2.66	1.31	0.93	0.454122	-0.0457392
Lacasse et al. 2007	Iceland, Katla caldera	Rhyolite KAT02-18	71.24	0.34	13.9	3.45		0.07	0.09	1.03	5.55	3.74	0.04	0.948202	-0.00471059
		Basalt KAT02-17	47.16	4.46	13.1	16.64		0.22	4.96	9.61	2.86	0.76	0.53	0.422007	-0.0519688
Pitchard et al. 2013	Yellowstone	Rhyolite GR-1-R	74.12	0.32	12.8		2.53	0.04	0.61	1.58	3.63	4.33	0.04	0.832787	-0.013568
		Basalt GR-1-B	54.77	1.39	15.39		9.02	0.14	6.2	8.71	3.04	1.16	0.17	0.406591	-0.0567185
Pitchard et al. 2013	Yellowstone*	Rhyolite GR-2D	76.74	0.15	12.27		1.58	0.01	0.1	0.56	3.76	4.81	0.03	0.928538	-0.00556237
		Rhyolite GR-3-R	77.04	0.13	12.13		1.54	0.01	0.03	0.54	3.75	4.82	0.02	0.938791	-0.00470815
		Rhyolite 08CP56	76.27	0.17	12.52		1.82	0.04	0.08	0.6	3.75	4.71	0.043	0.900037	-0.00795105
		Rhyolite 08CP57	76.94	0.122	12.09		1.74	0.009	0.02	0.51	3.7	4.85	0.016	0.937779	-0.00477235
		Basalt GR-3-2-B	57.33	1.34	15.38		8.17	0.12	4.83	7.89	3.35	1.4	0.17	0.456911	-0.0522488
* compositions not listed in text
Further natural bimodal volcanic systems with other compositions others than rhyolite and basalt
Gertisser et al. 2009	Santorini	Basalt (MI 51)	62.11	0.61	19.37		4.84	0.16	1.02	5.89	4.26	1.53	0.21	0.447354	-0.0691712
		Rhyodacite (MI 39)	70.07	0.47	15.49		3.44	0.13	0.47	2.08	4.98	2.74	0.14	0.720445	-0.0277046
Di Muro et al. 2008	Mt. Pinatubo	Andesite B06	52.35	0.9	17.22		8.53	0.13	6.91	9.06	3.68	0.86	0.13	0.405673	-0.063751
		Dacite D-522726	64.2	0.48	16.4		0	0.1	2.07	4.8	4.34	1.46	0.1	0.531774	-0.0515829
Sigmundsson et al. 2010	Eyjafjallajökull	FIM-1 (Basalt)	47.79	3.13	13.68		12.31	0.18	8.67	10	3.03	0.64	0.44	0.415065	-0.0492073
		FIM-2	47.72	3.01	13.78		12.21	0.18	8.91	10.07	2.95	0.62	0.43	0.40093	-0.0506837
		SRG 2b (Trachyandesite)	57.98	1.8	14.87		9.75	0.24	2.3	5.5	5.01	1.79	0.53	0.684645	-0.0300358
		SRG 5a	56.73	1.88	14.65		9.93	0.24	3.15	6.11	5.04	1.65	0.43	0.687951	-0.029076
Synthetic melt compositions of this work
Marks et al. this work		Rhyolite AOQ2	75.16		12.76						6.54	5.5		1.30988	0.0251809
		Basalt	54.75	3.64	13.87		11.84	0.2	4.05	7.93	3.16	1.46		0.488798	-0.0443248
		MI_T_3 Hyb	71.87	0.02	12.24		1.53	0.11	0.58	1.48	4.7	4.56		1.03506	0.00279766
		MI_7_Hyb	71.06	0.03	11.99		2.01	0.04	0.74	1.54	4.65	4.18		1.01547	0.0012175
		MI_6_Hyb	71.35	0.01	12.29		1.56	0.04	0.66	1.31	4.44	4.28		0.97138	-0.00231945
